# Supplementary material for: Dihydrophenanthrenes from a Sicilian Accession of Himantoglossum robertianum (Loisel.) P. Delforge Showed Antioxidant, Antimicrobial, and Antiproliferative Activities
Source: MDPI journal article supplement (doi:10.3390/plants10122776), 2021-12-15
Supplement: s1 [file s1]

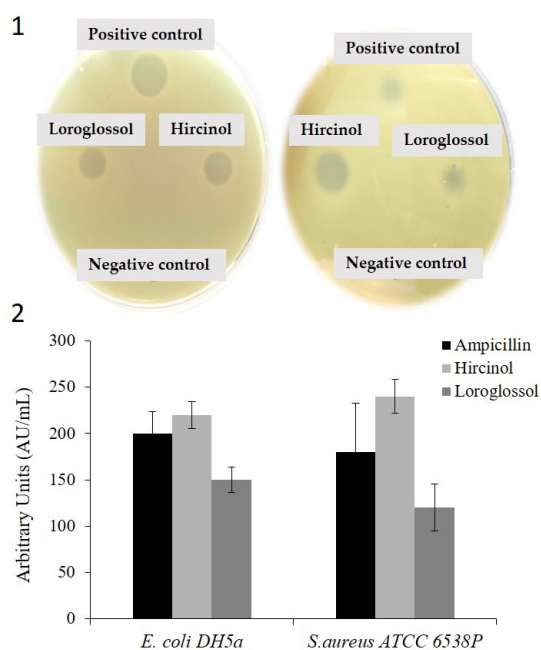

**Figure S1.** (1) Inhibition halo of hircinol and loroglossol against (A) *E. coli* DH5α, (B) *S. aureus* ATCC6538P. Positive control is represented by the antibiotic Ampicillin, negative control is dimethyl sulphoxide (DMSO 80%). (2) The inhibition halos showed in panel 1 are expressed in AU/ml (see methods). Values are expressed as average of three different experiments; standard deviations are always less than 10%.

**Table S1.** Minimum inhibitory concentration values of loroglossol and hircinol against *E. coli* DH5α and *S. aureus* ATCC 6538P

| Microrganism                | Loroglossol [M]       | Hircinol [M]        |
|-----------------------------|-----------------------|---------------------|
| <i>E. coli</i> DH5α         | $> 1.2 \cdot 10^{-3}$ | $1.2 \cdot 10^{-3}$ |
| <i>S. aureus</i> ATCC 6538P | $1.2 \cdot 10^{-3}$   | $4.1 \cdot 10^{-4}$ |

Values were obtained from a minimum of 3 independent trials.
